# Supplementary material for: The Phenolic Compounds in the Young Shoots of Selected Willow Cultivars as a Determinant of the Plants’ Attractiveness to Cervids (Cervidae, Mammalia)
Source: MDPI journal article supplement (doi:10.3390/biology10070612), 2021-07-02
Supplement: s1 [file s1]

**Table S1.** Qualitative and quantitative analyses were carried out using the Multiple Reaction Monitoring (MRM) method for appropriate external standards.

| Ion source conditions    | Ionization mode |
|--------------------------|-----------------|
|                          | Negative        |
| Nitrogen curtain gas     | 25 L/min        |
| Collision gas            | 9 L/min         |
| Ion spray source voltage | -4500 V         |
| Temperature              | 350 °C          |
| Nebulizer gas            | 35 L/min        |
| Turbo gas                | 30 L/min        |

**Table S2.** The calibration curve (the range of 5-100 nM) was linear with a correlation coefficient of 0.97.

| Compound                | Q1 (Da) | Q3 (Da) | Declustering potential (V) | Collision energy (V) | Collision cell exit potential (V) |
|-------------------------|---------|---------|----------------------------|----------------------|-----------------------------------|
| helicin                 | 283.0   | 93.0    | -70                        | -50                  | -12                               |
| salicin                 | 285.0   | 123.0   | -100                       | -45                  | -10                               |
| salidroside             | 299.1   | 89.0    | -130                       | -19                  | -10                               |
| saligenin               | 123.0   | 105.1   | -65                        | -19                  | -10                               |
| picein                  | 297.0   | 135.2   | -60                        | -26                  | -16                               |
| ferulic acid            | 193.0   | 134.1   | -140                       | -24                  | -12                               |
| <i>p</i> -coumaric acid | 163.0   | 119.0   | -90                        | -20                  | -12                               |
| sinapic acid            | 223.0   | 208.1   | -100                       | -21                  | -12                               |
| caffeic acid            | 179.0   | 135.0   | -90                        | -25                  | -14                               |
| chlorogenic acid        | 353.2   | 191.1   | -60                        | -33                  | -15                               |
| protocatechuic acid     | 153.0   | 109.0   | -100                       | -10                  | -16                               |
| <i>t</i> -cinnamic acid | 147.0   | 103.1   | -145                       | -18                  | -12                               |
| vanillic acid           | 167.1   | 108.0   | -100                       | -16                  | -14                               |
| isovanillic acid        | 167.0   | 152.0   | -95                        | -15                  | -15                               |
| quercetin               | 301.1   | 151.1   | -115                       | -35                  | -12                               |
| isorhamnetin            | 315.1   | 300.1   | -125                       | -32                  | -25                               |
| kaempferol              | 285.0   | 93.0    | -100                       | -50                  | -15                               |
| apigenin                | 269.0   | 117.0   | -100                       | -50                  | -10                               |
| luteoin                 | 285.1   | 133.1   | -110                       | -40                  | -14                               |
| catechin                | 289.2   | 245.3   | -100                       | -22                  | -16                               |
| naringenin              | 271.0   | 151.0   | -100                       | -26                  | -11                               |
| prunin                  | 433.2   | 271.1   | -170                       | -27                  | -18                               |
| taxifolin               | 303.0   | 285.1   | -95                        | -19                  | -21                               |
